# Supplementary material for: Sea-ice indicators of polar bear habitat
Source: Copernicus journal article supplement (doi:10.5194/tc-10-2027-2016), 2016-09-14
Supplement: Supplementary file 1 [file tc-10-2027-2016-supplement.pdf]

Supplement of The Cryosphere, 10, 2027–2041, 2016  
<http://www.the-cryosphere.net/10/2027/2016/>  
doi:10.5194/tc-10-2027-2016-supplement  
© Author(s) 2016. CC Attribution 3.0 License.

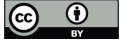

*Supplement of*

## **Sea-ice indicators of polar bear habitat**

**Harry L. Stern and Kristin L. Laidre**

*Correspondence to:* Harry L. Stern ([harry@apl.washington.edu](mailto:harry@apl.washington.edu))

The copyright of individual parts of the supplement might differ from the CC-BY 3.0 licence.

## Supplement

### S1. Daily Sea-Ice Area

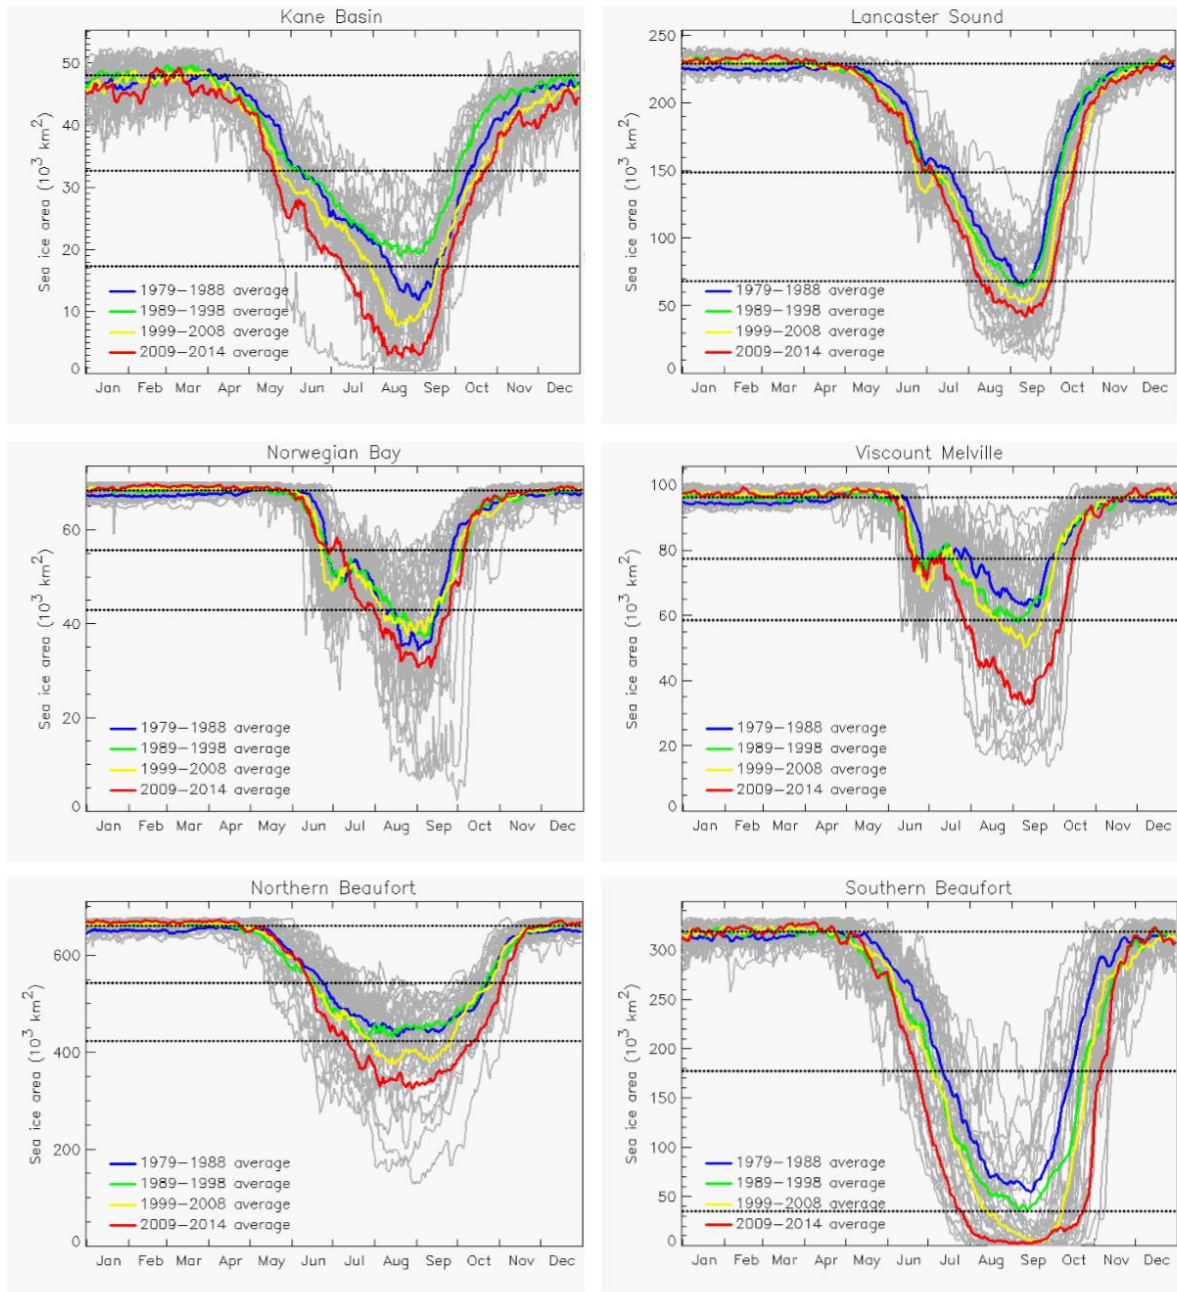

5 **Figure S1.** Daily sea-ice area, January-December, 1979-2014 (gray curves), by region (all depths). Colored curves are decadal averages as indicated. Upper horizontal dotted line is average sea-ice area in March; lower horizontal dotted line is average sea-ice area in September; middle horizontal dotted line is threshold for determining dates of spring sea-ice retreat and fall sea-ice advance. See Fig. 2 for Baffin Bay region. See Fig. 1 and Table 1 for locations of regions.

10

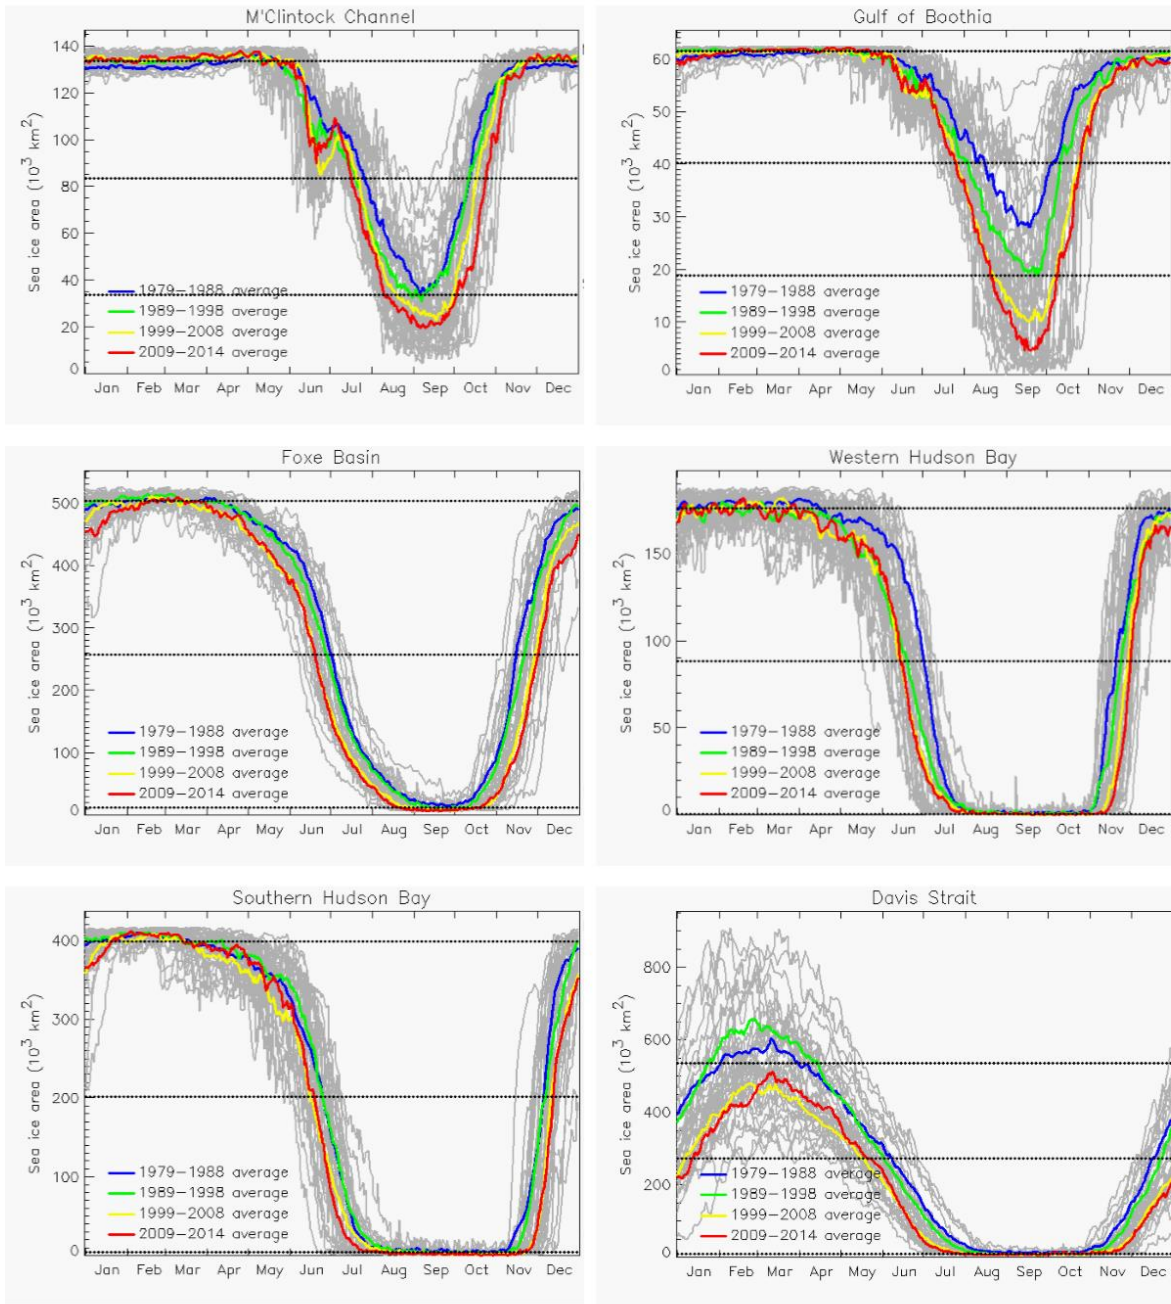

**Figure S1 (continued).** Daily sea-ice area by region.

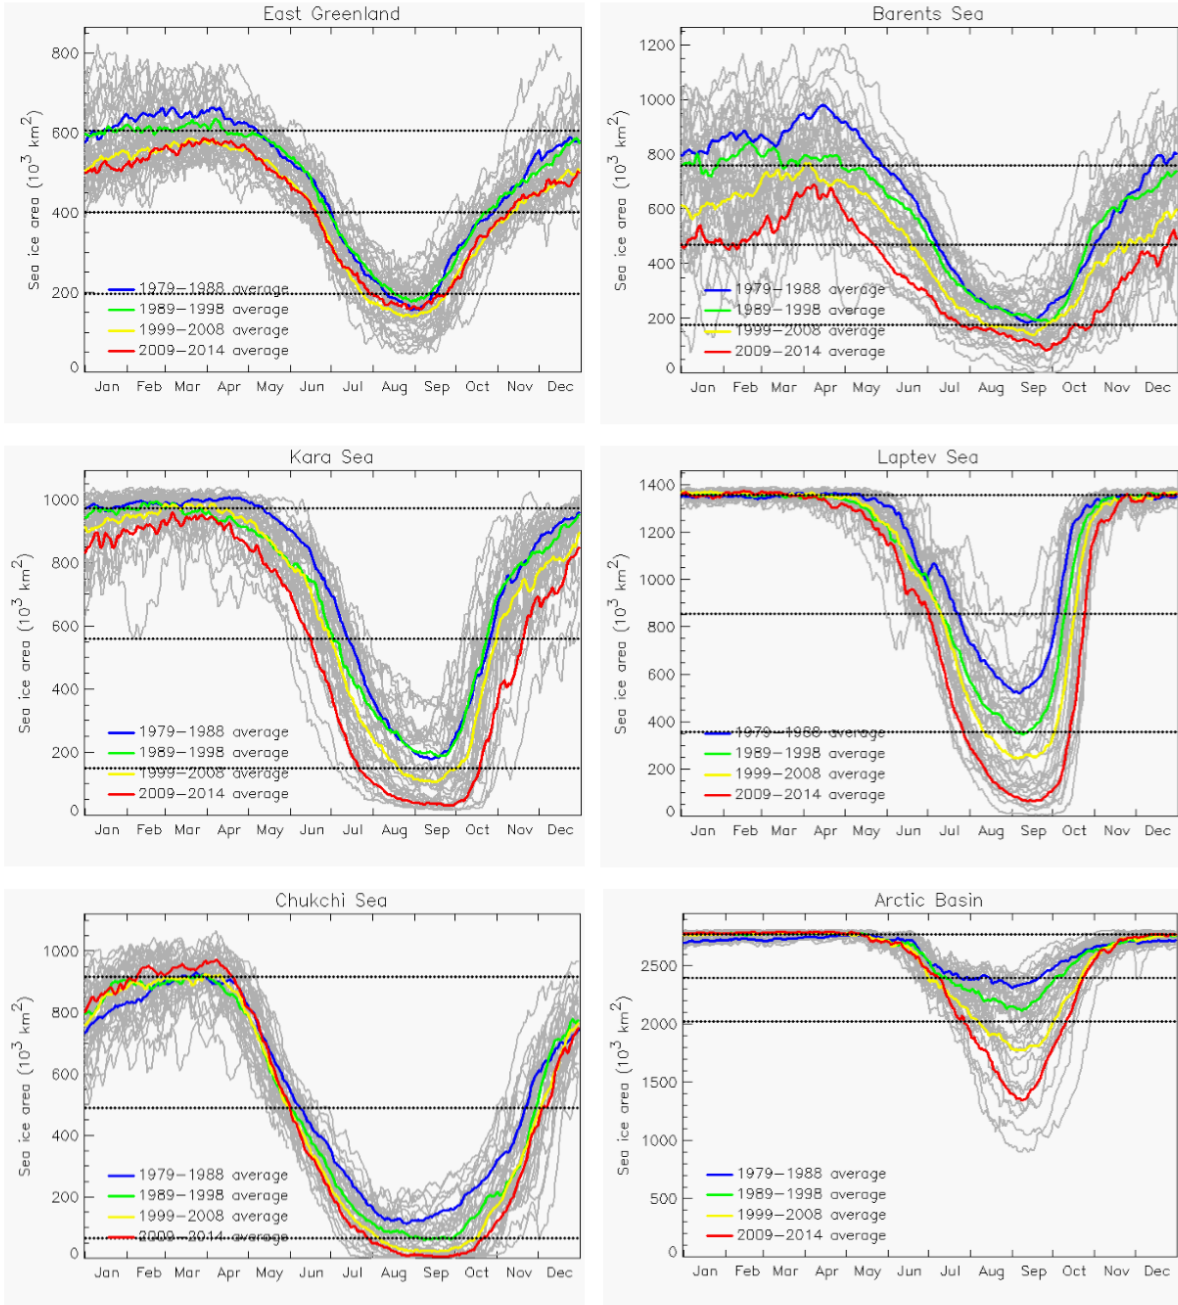

15

**Figure S1 (continued).** Daily sea-ice area by region.

20 **S2. Dates of Sea-Ice Retreat and Advance**

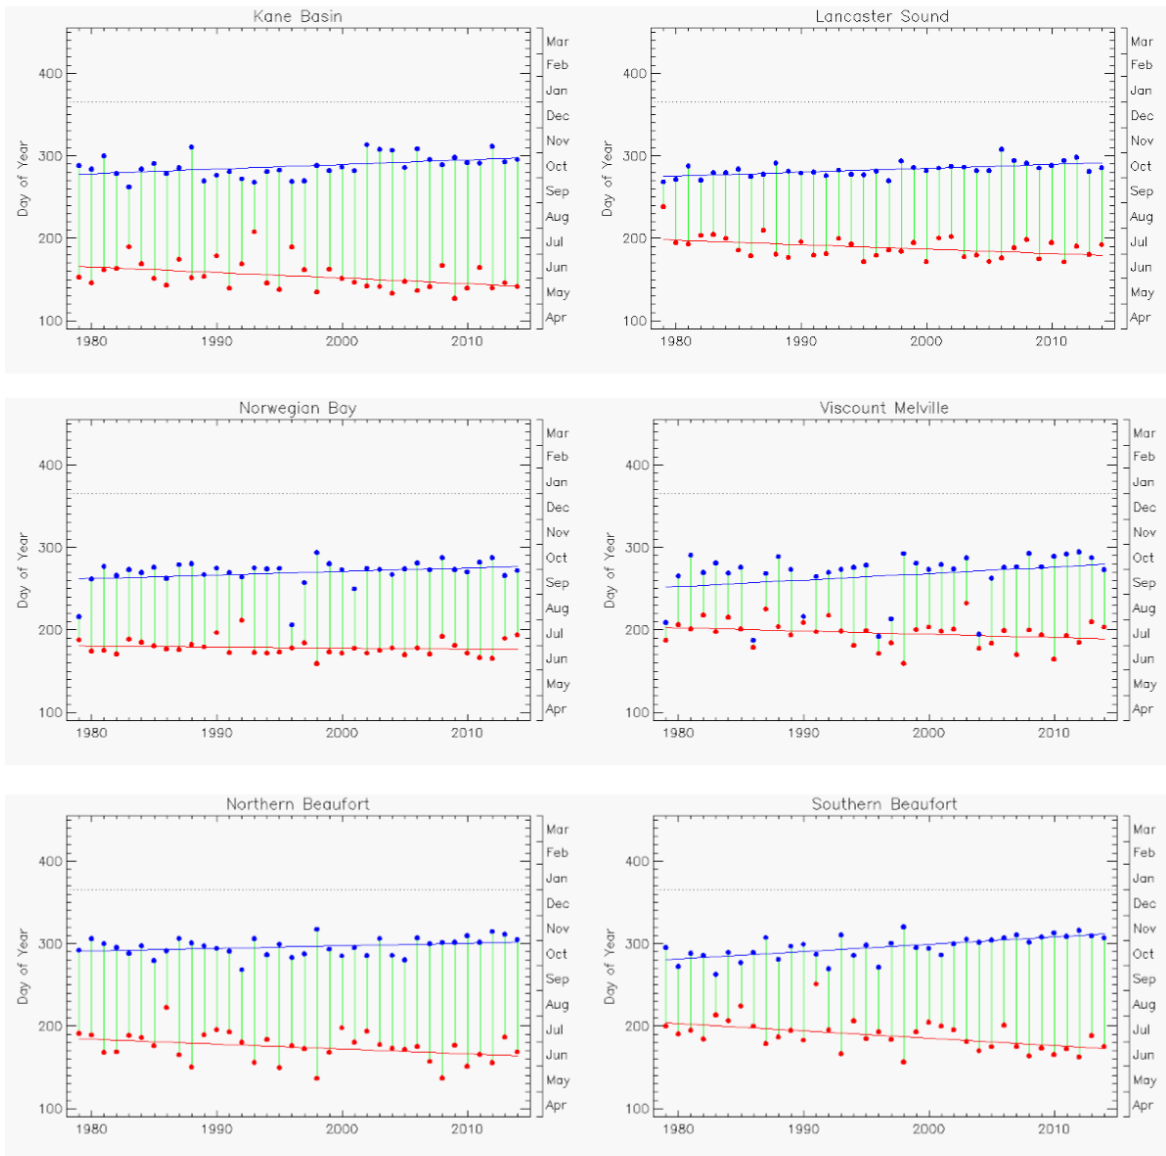

**Figure S2.** Dates of sea-ice retreat (red) and sea-ice advance (blue) for 1979-2014, by region (all depths). The red and blue lines are least-squares fits. The vertical green lines indicate the time interval between retreat and advance (i.e., length of summer season). See Fig. 4 for Baffin Bay region. See Table 3 for trends.



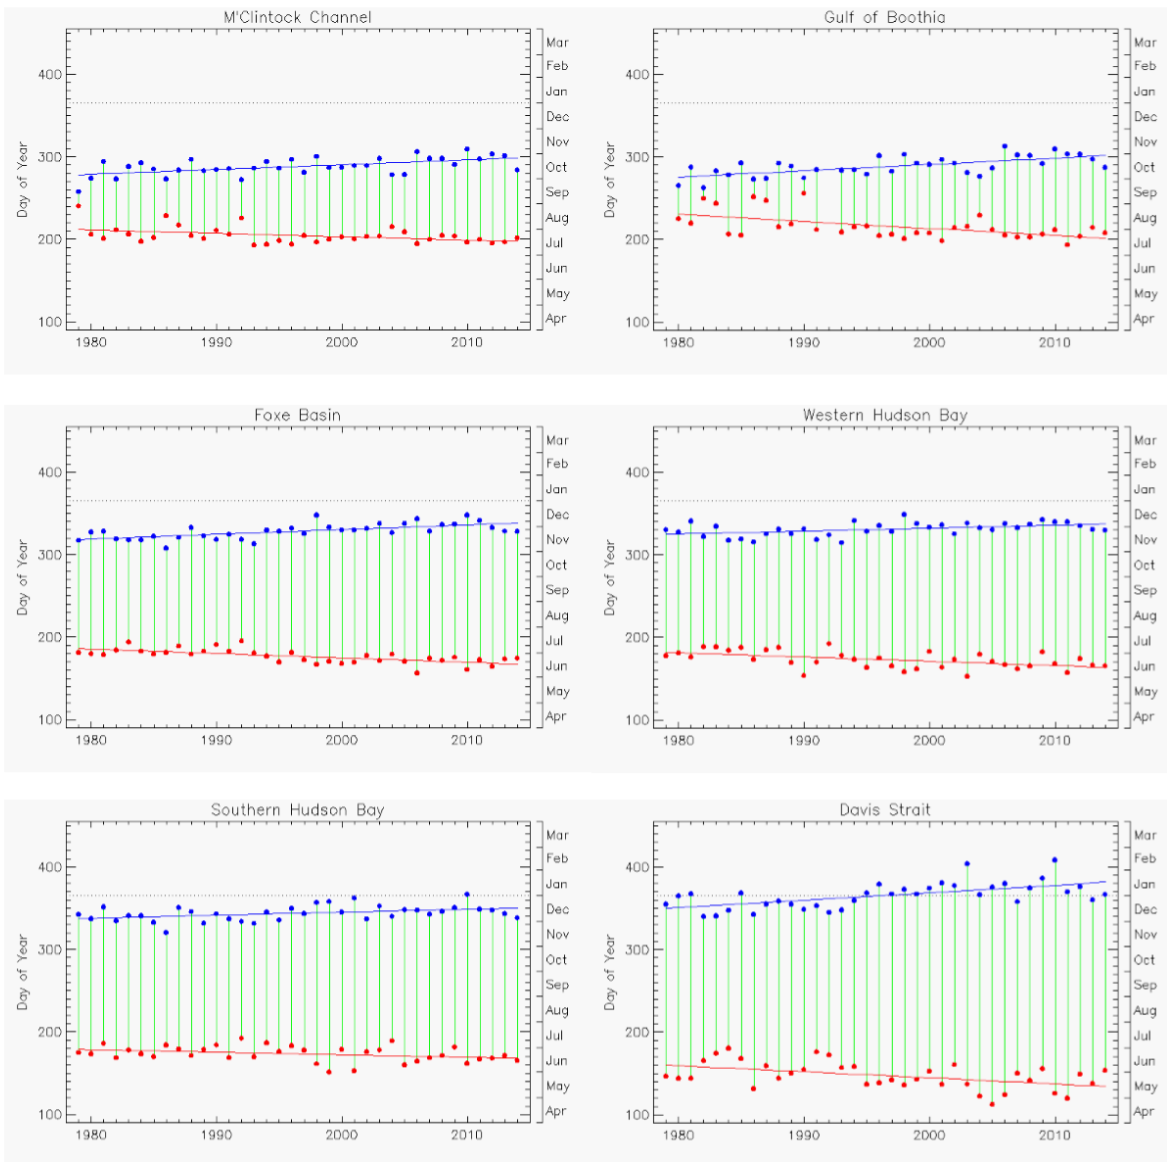

**Figure S2 (continued).** Dates of sea-ice retreat and advance, by region.

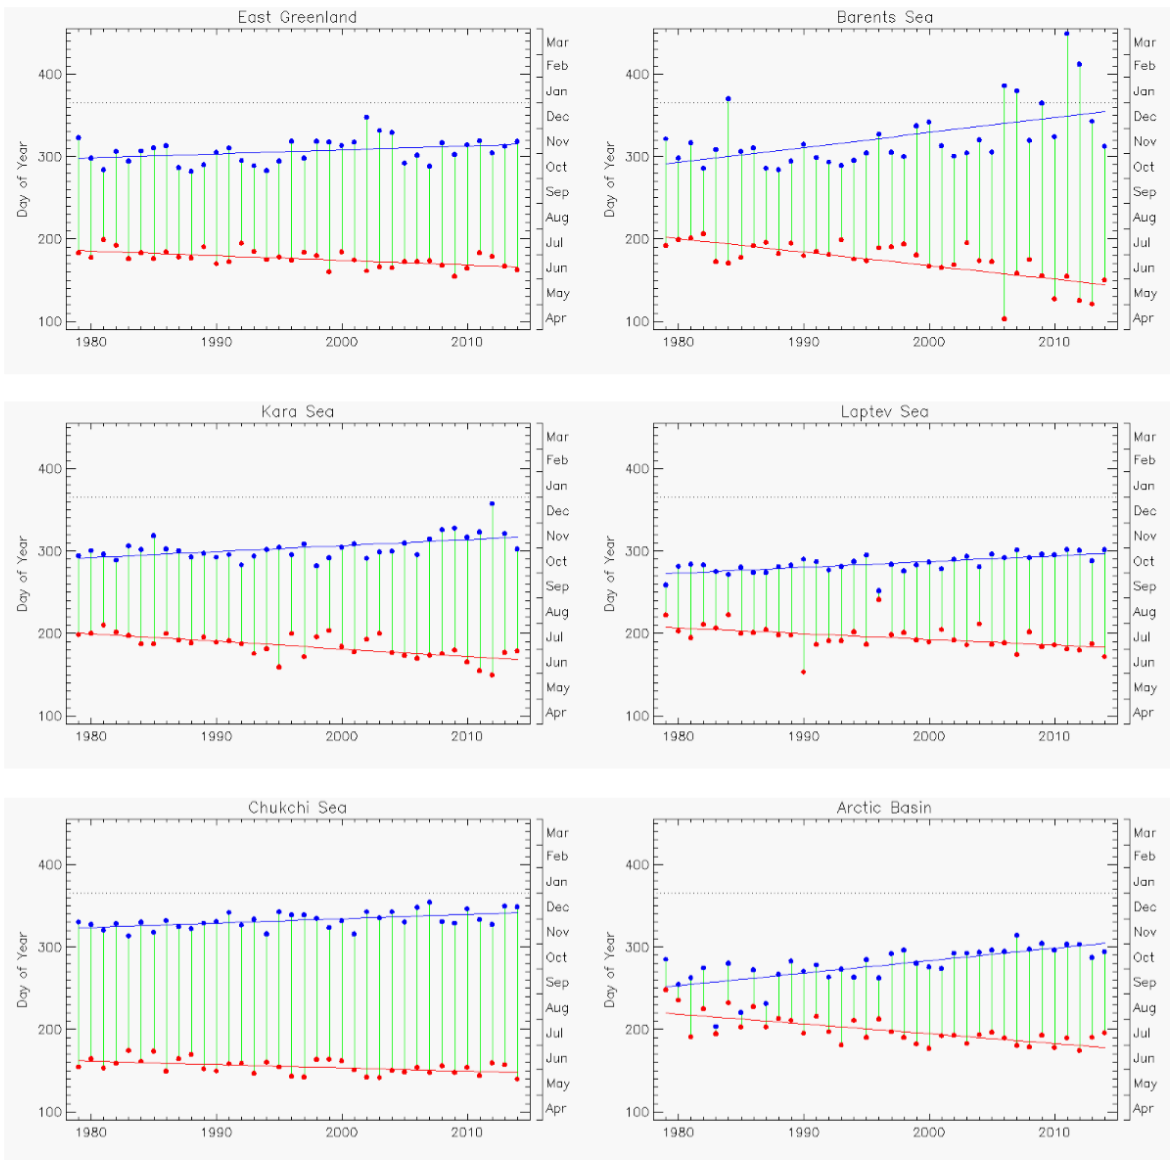

30

**Figure S2 (continued).** Dates of sea-ice retreat and advance, by region.

35 **S3. Length of the Summer Season**

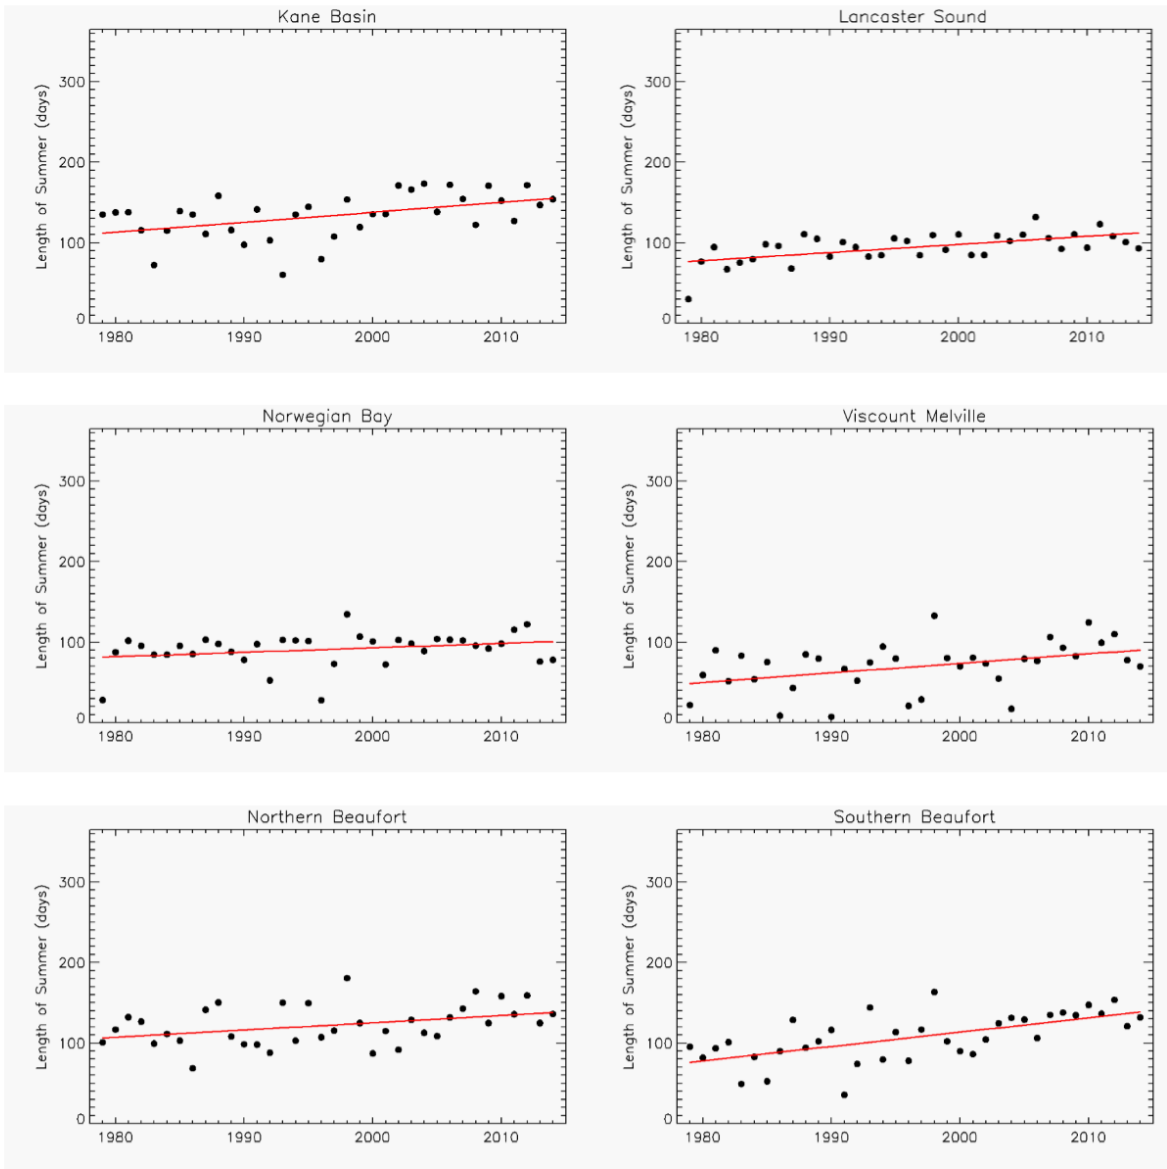

**Figure S3.** Length of the summer season (from spring sea-ice retreat to fall sea-ice advance) vs. year, by region (all depths), with least-squares line in red. See Fig. 5 for Baffin Bay region. See Table 3 for trends.



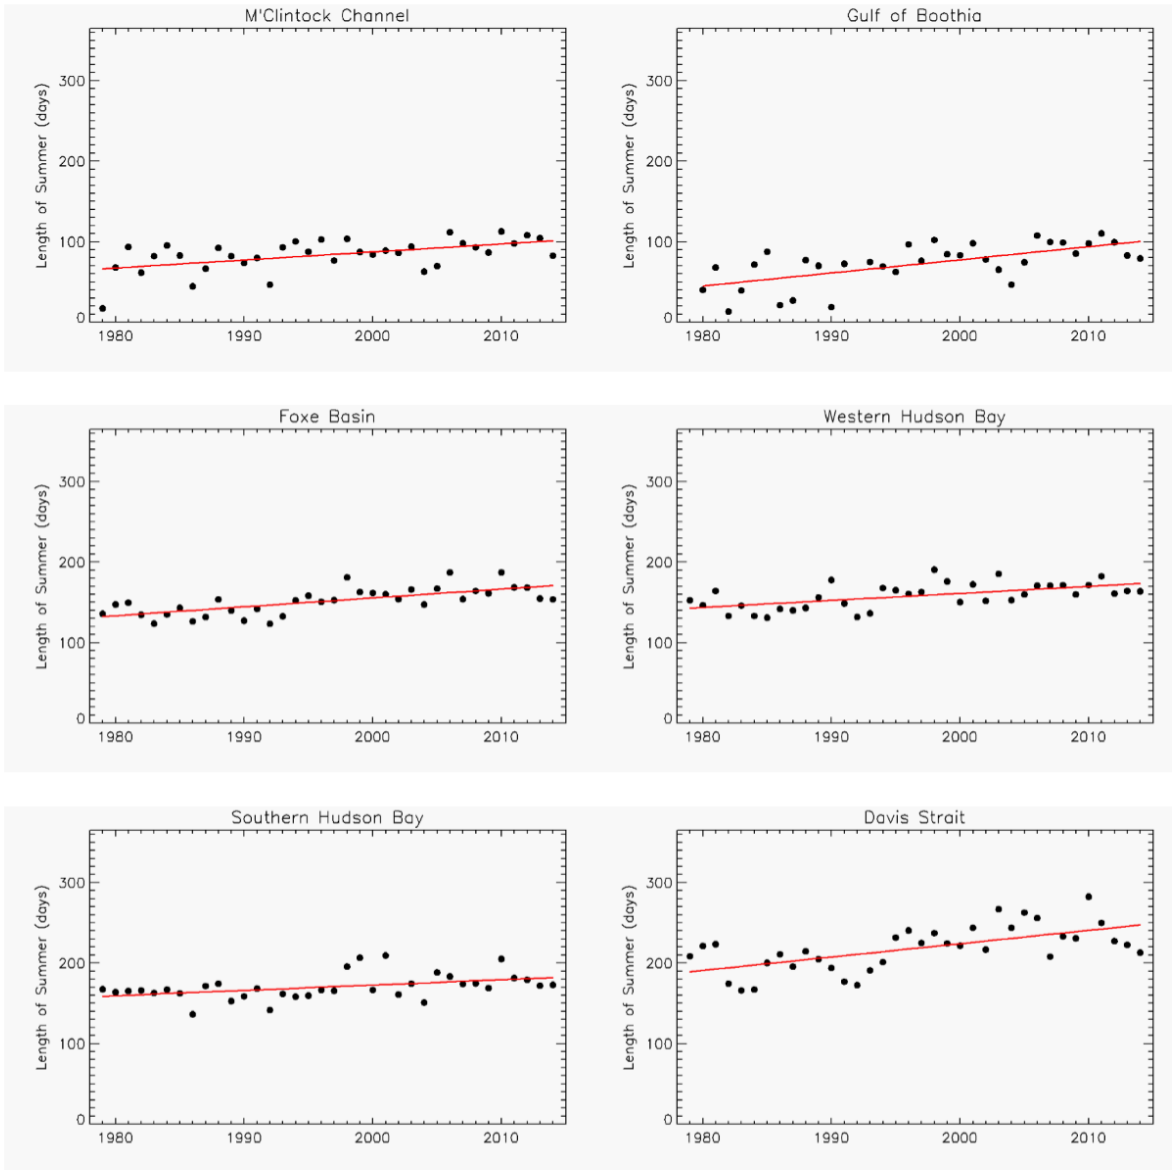

**Figure S3** (continued). Length of the summer season, by region.

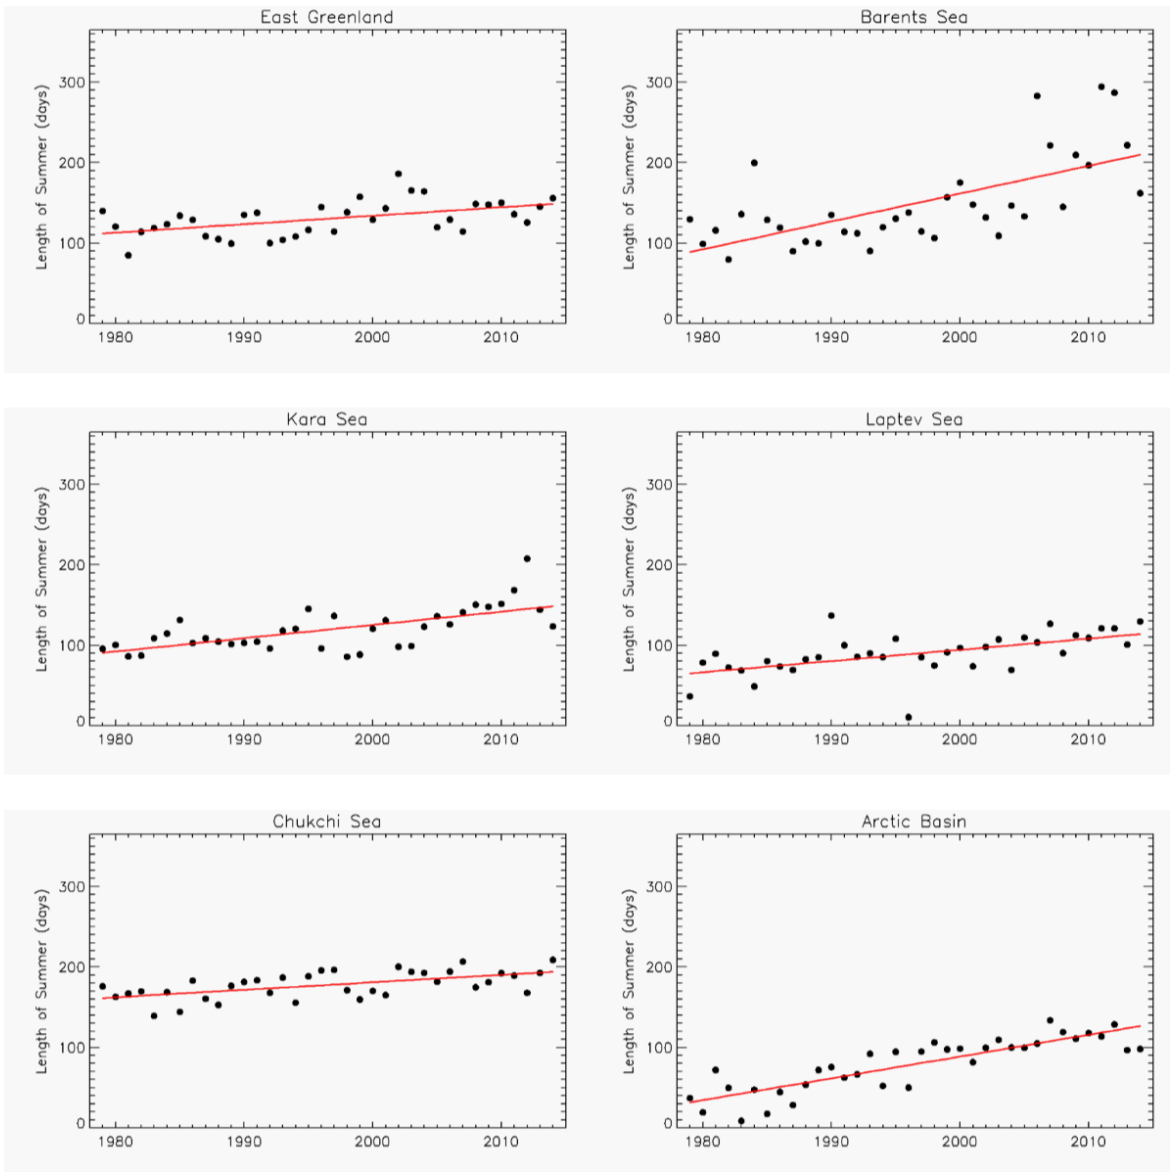

45 **Figure S3** (continued). Length of the summer season, by region.

## S4. Summer Sea-Ice Concentration

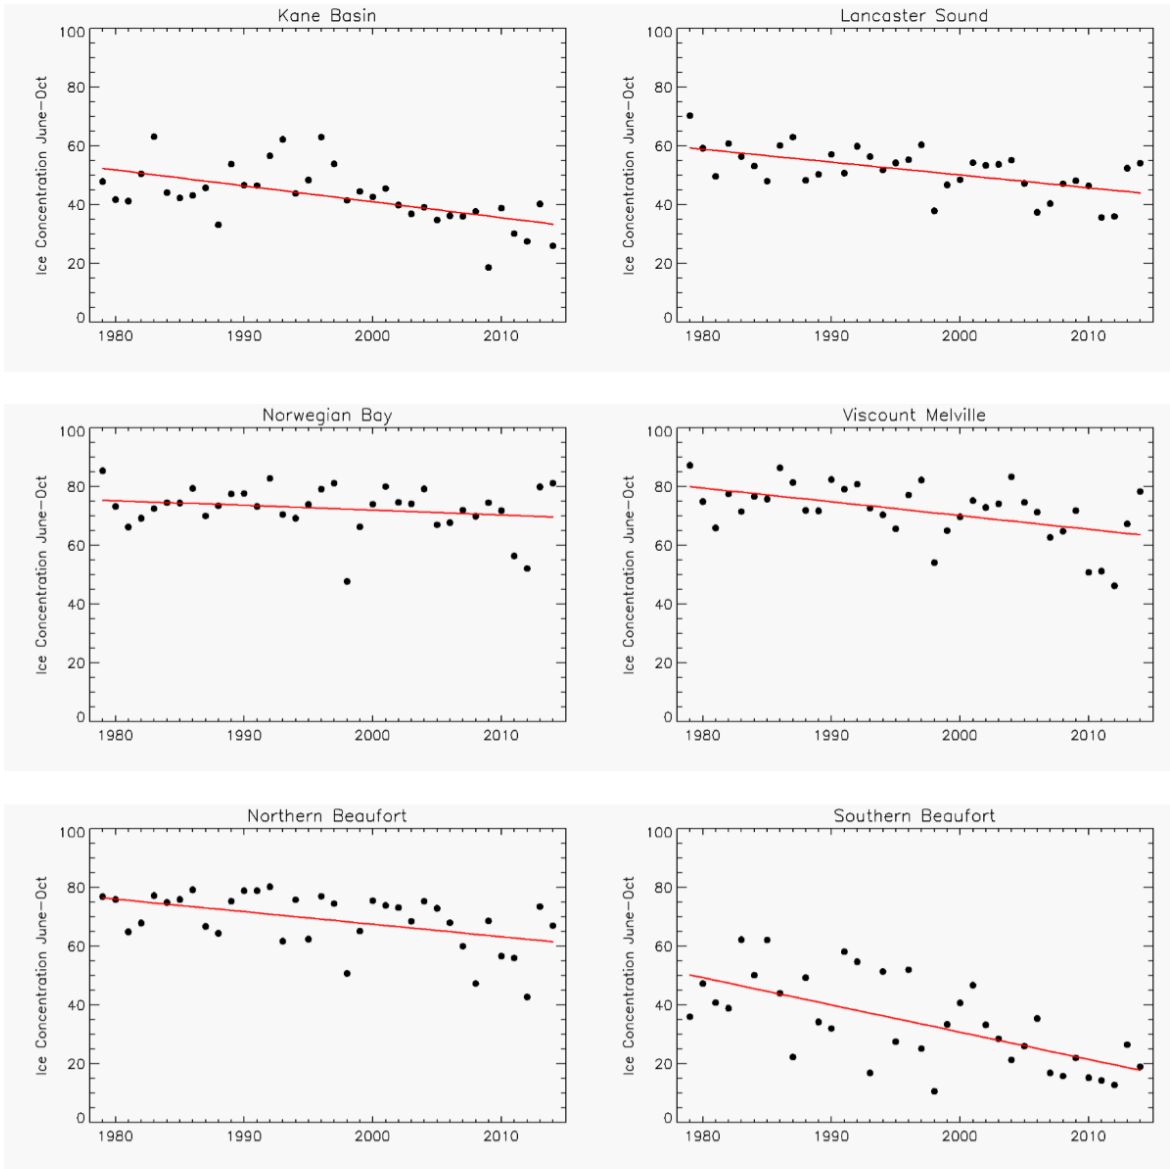

50

**Figure S4.** Summer (June through October) sea-ice concentration vs. year, by region (all depths), with least-squares line in red. See Fig. 6 for Baffin Bay region. See Table 3 for trends.

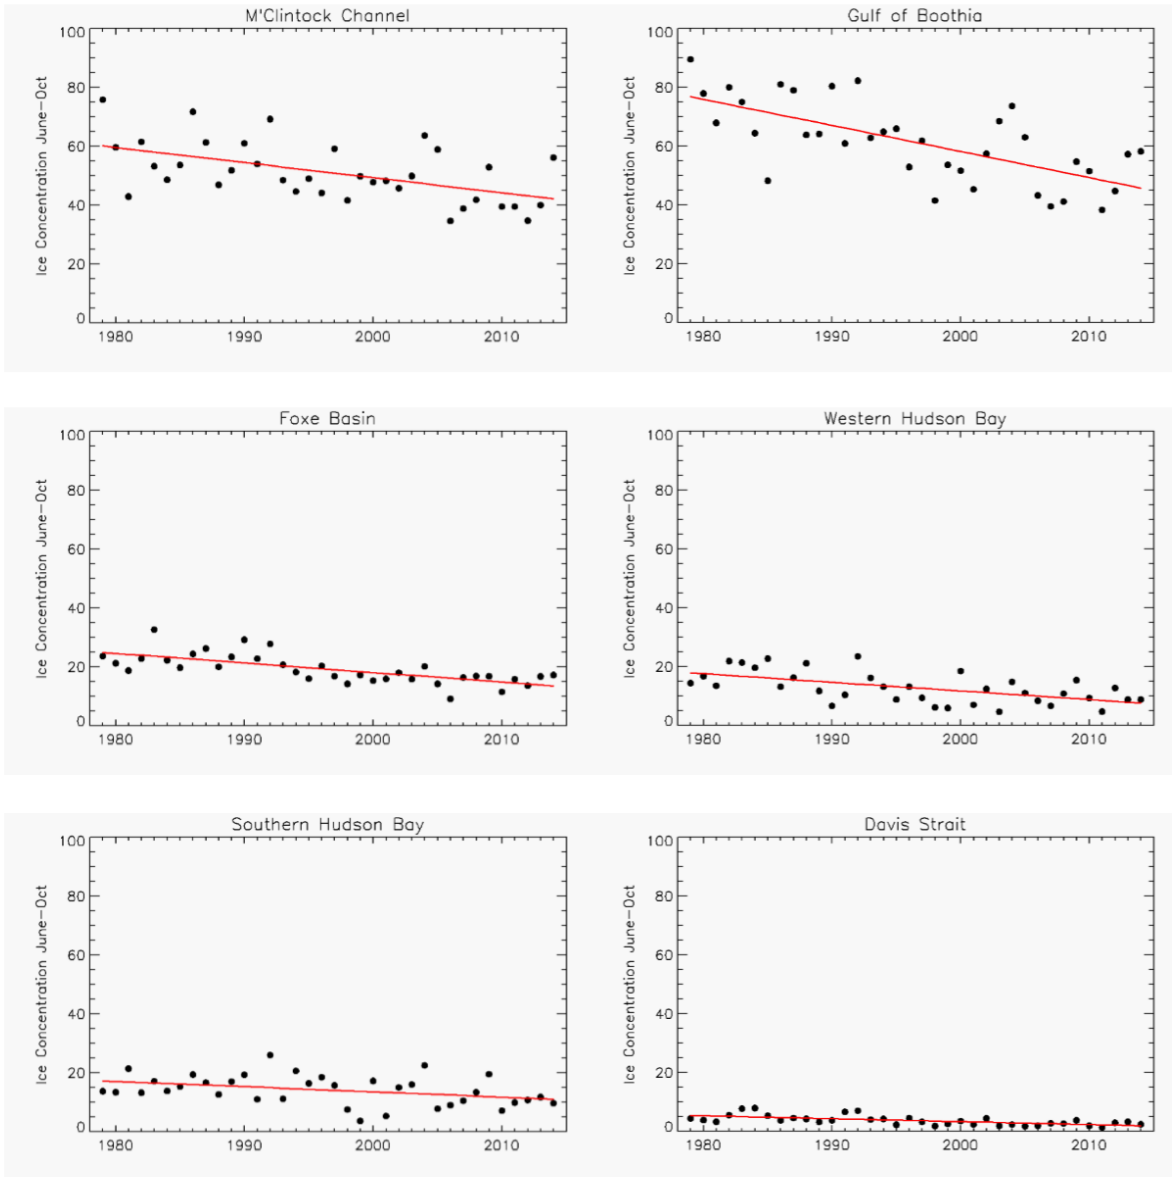

55

**Figure S4** (continued). Summer (June through October) sea-ice concentration, by region.

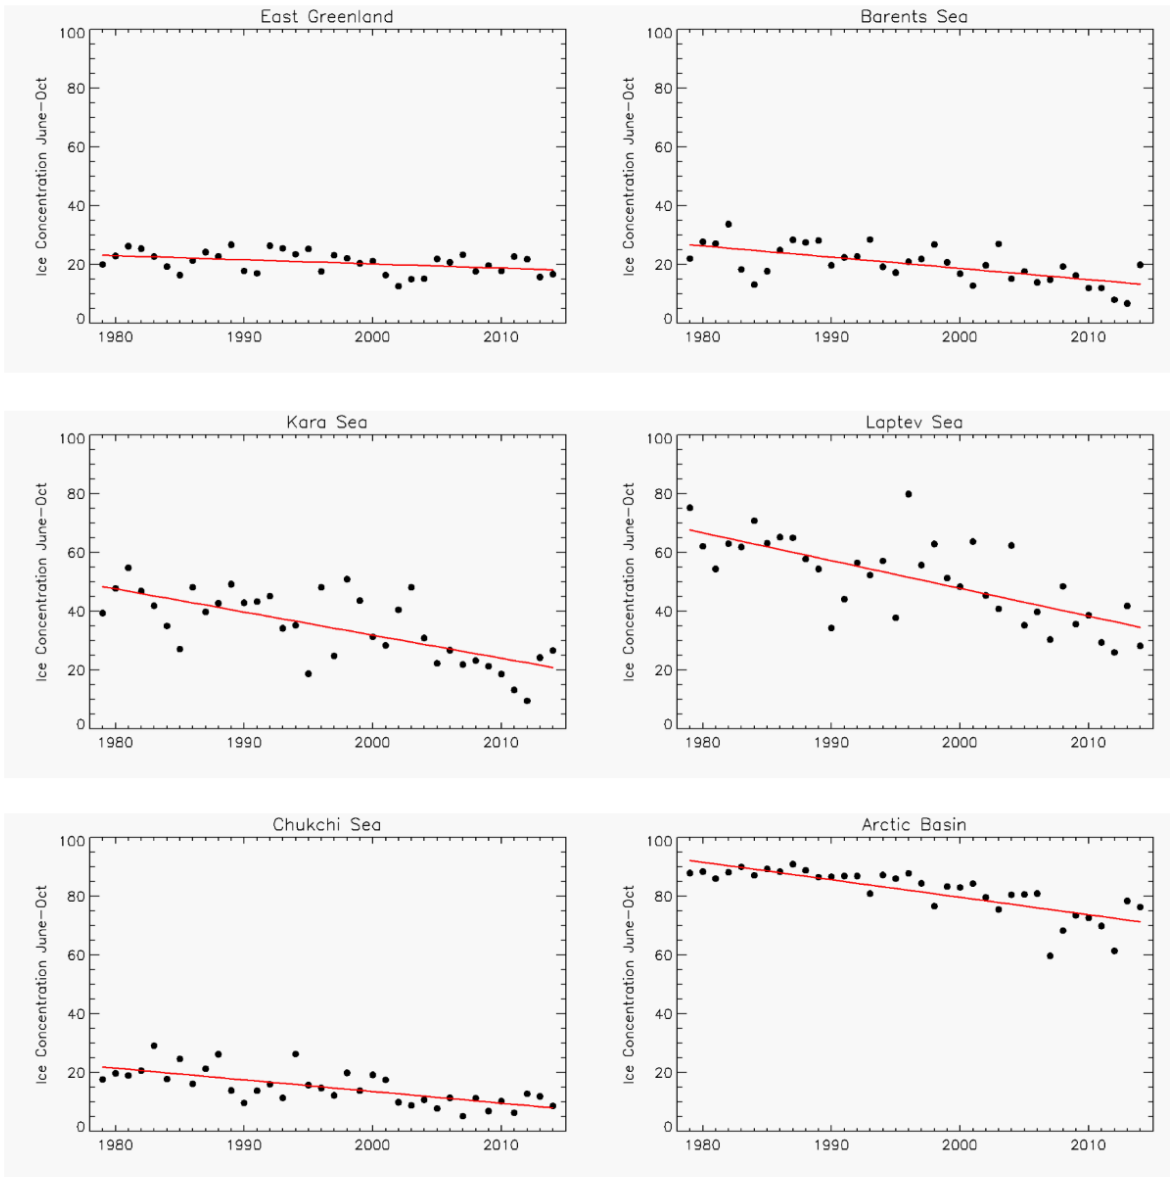

**Figure S4** (continued). Summer (June through October) sea-ice concentration, by region.

60 **S5. Number of Ice-Covered Days**

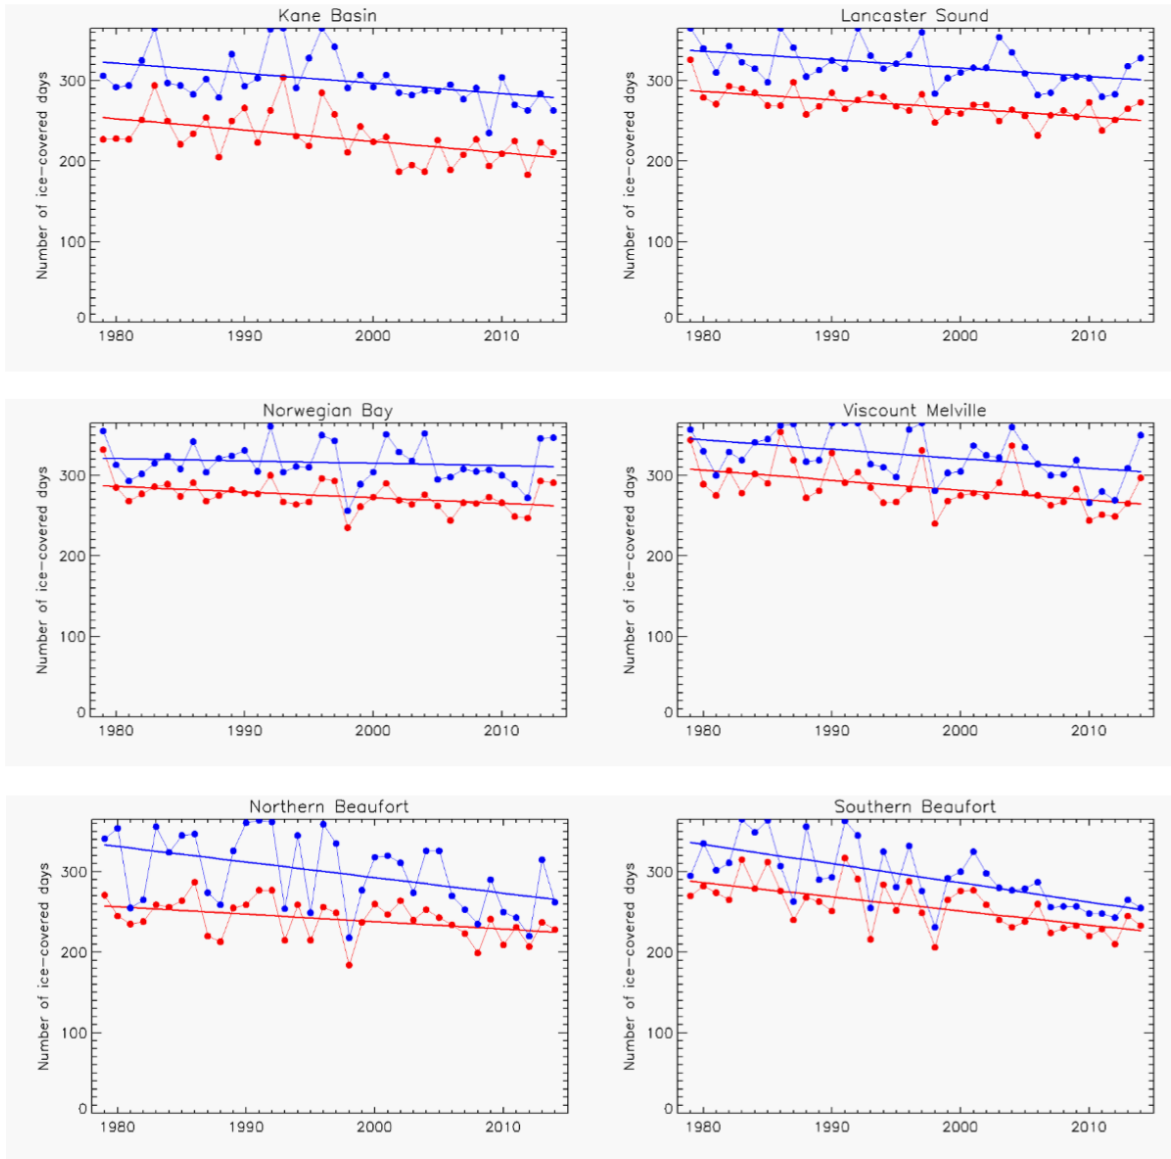

**Figure S5.** Number of ice-covered days per year, 1979-2014, by region (all depths). An ice-covered day is one in which the sea-ice area exceeds a threshold (defined in main text). Blue: number of ice-covered days above 15% threshold. Red: number of ice-covered days above 50% threshold. Least-squares lines are also shown. See Fig. 8 for Baffin Bay region. See Table 3 for trends.



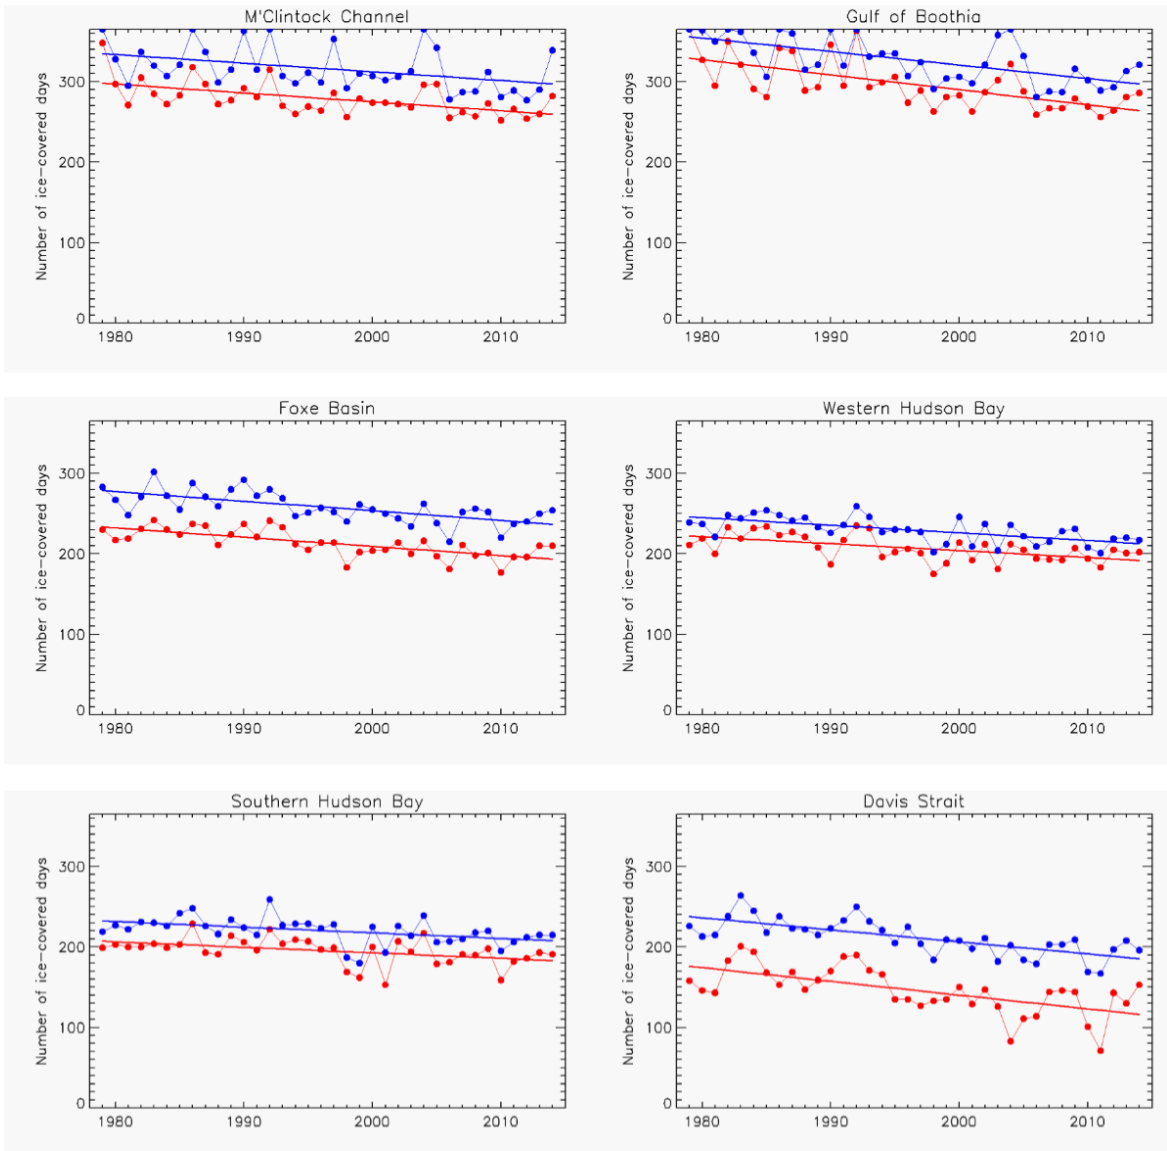

**Figure S5** (continued). Number of ice-covered days, by region.

70

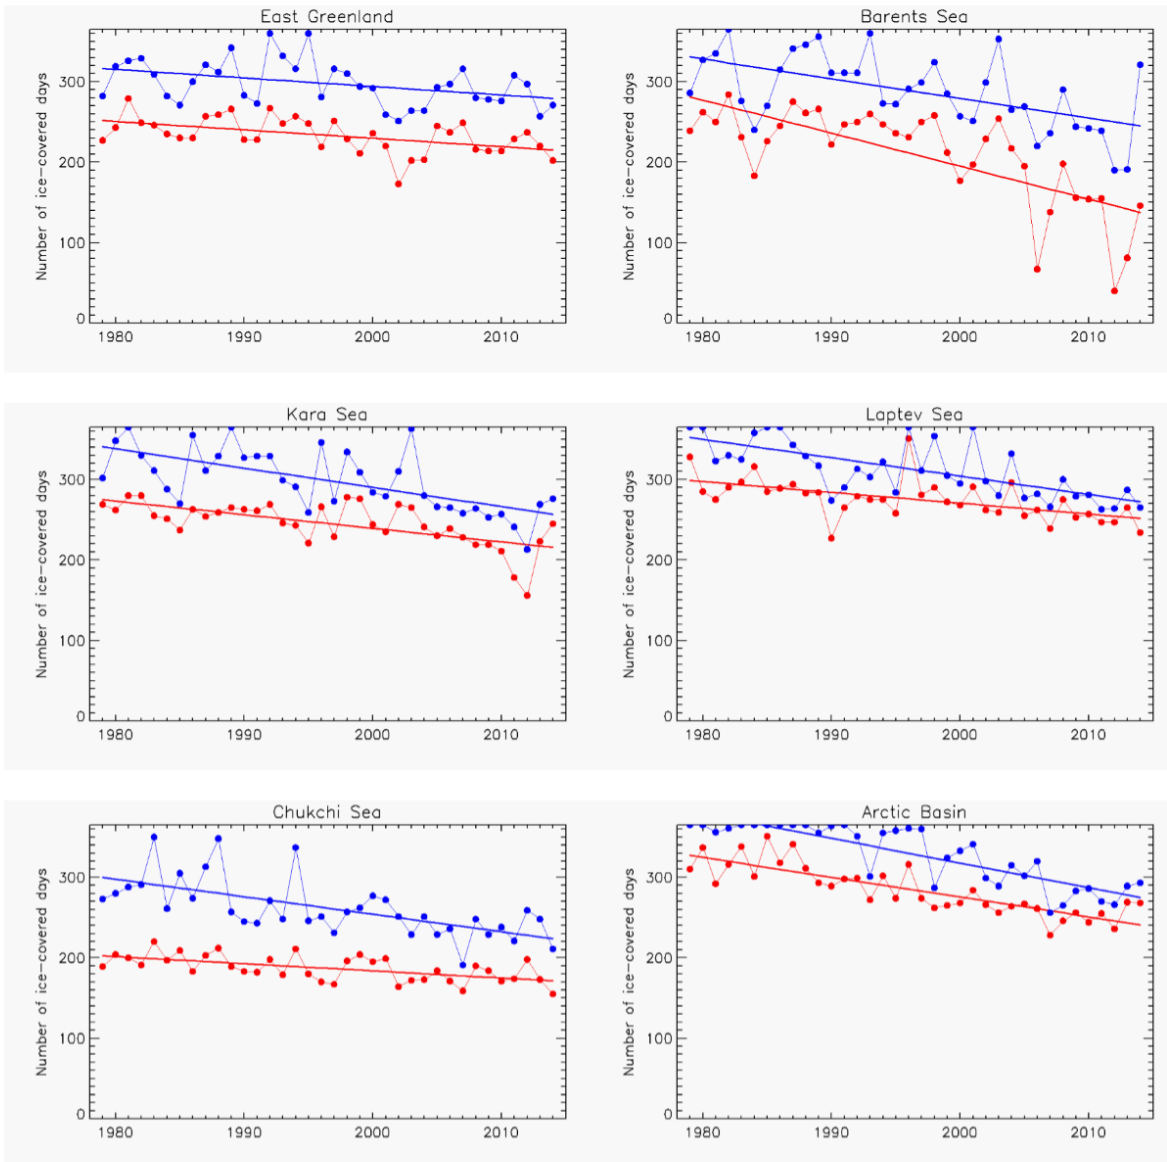

**Figure S5** (continued). Number of ice-covered days, by region.
